# Supplementary material for: Atomic Resolution X-ray Structure of the Substrate Recognition Domain of Higher Plant Ribulose-bisphosphate Carboxylase/Oxygenase (Rubisco) Activase
Source: PubMed Central journal article supplement — J Biol Chem. 2011 Aug 31;286(41):35683–8. doi: 10.1074/jbc.C111.289595 (PMC3195603; doi:10.1074/jbc.c111.289595), 2011-08-31
Supplement: supp_C111.289595_jbc.C111.289595-1.pdf [file supp_C111.289595_jbc.C111.289595-1.pdf]

**FIGURE S2.** Structure-based sequence alignment of the creosote C-domain fragment with the C-domain of FtsH (PDB ID 3KDS) using the Dali server (2).

C-domain           :           :           :           :           |           :           :           :           :  
 FtsH (3KDS)    TREDRIGVCKGIFRTDNVADDDIVKLVDTFPGQSIDDFGALRARVYDDEVKRWVSEVGVDTIGKKLVNSKEGPPSFEQPKMTIDKLLGYGMLVQEQ  
                   DMLGRKKILEIHRNKPL---NLEIIAKRTPGFVGDLENLVNEALAREG-----DKITMKDFEEAIDRVIAG-

**FIGURE S3.** Electrostatic surface potential calculation using the program APBS (3). Shown is the surface of the paddle-like extension in two different orientations, rotated around the long axis by 180 degrees. **A**, surface bearing Trp302 (“inner surface”); **B**, surface bearing Lys313 (“outer surface”). The calculations were carried out with a protein dielectric constant of 5.0, a solvent dielectric of 78.0, a solvent access radius of 1.4 Å, and 150 mM salt concentration in bulk solvent. Red: acidic regions; blue: basic regions; grey: neutral regions.

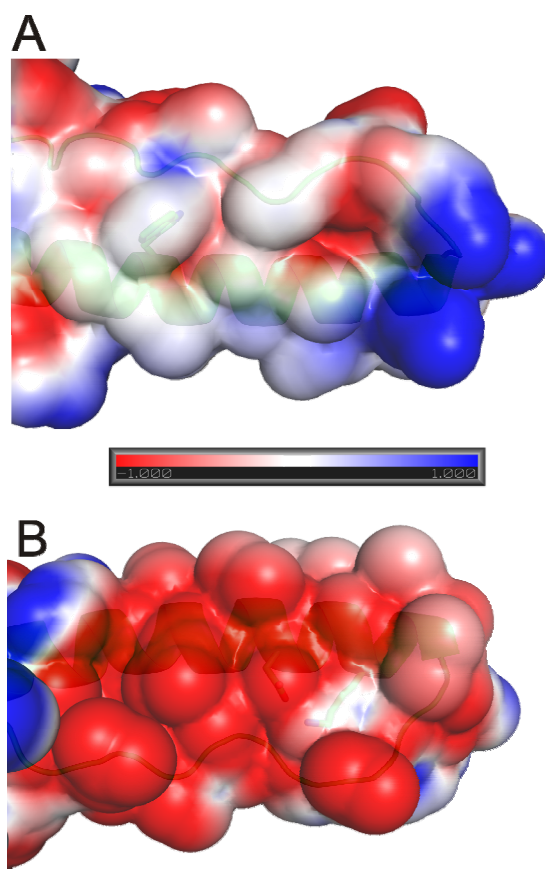

## REFERENCES

- 1) Larkin et al. (2007) *Bioinformatics* **23** (21), 2947-2948.
- 2) Holm, L. & Rosenström, P. (2010) *Nucleic Acids Res.* **38**, W545-549.
- 3) Baker NA, Sept D, Joseph S, Holst MJ, McCammon JA. (2007) *Proc. Natl. Acad. Sci. USA* **98**, 10037-10041.
